# Supplementary material for: Structure and magnetic properties of LnBaFe4O7 oxides: Ln size effect
Source: Royal Society of Chemistry journal article supplement (doi:10.1039/b911611g), 2009-01-01
Supplement: b911611g.pdf [file b911611g.pdf]

### Supplementary figures

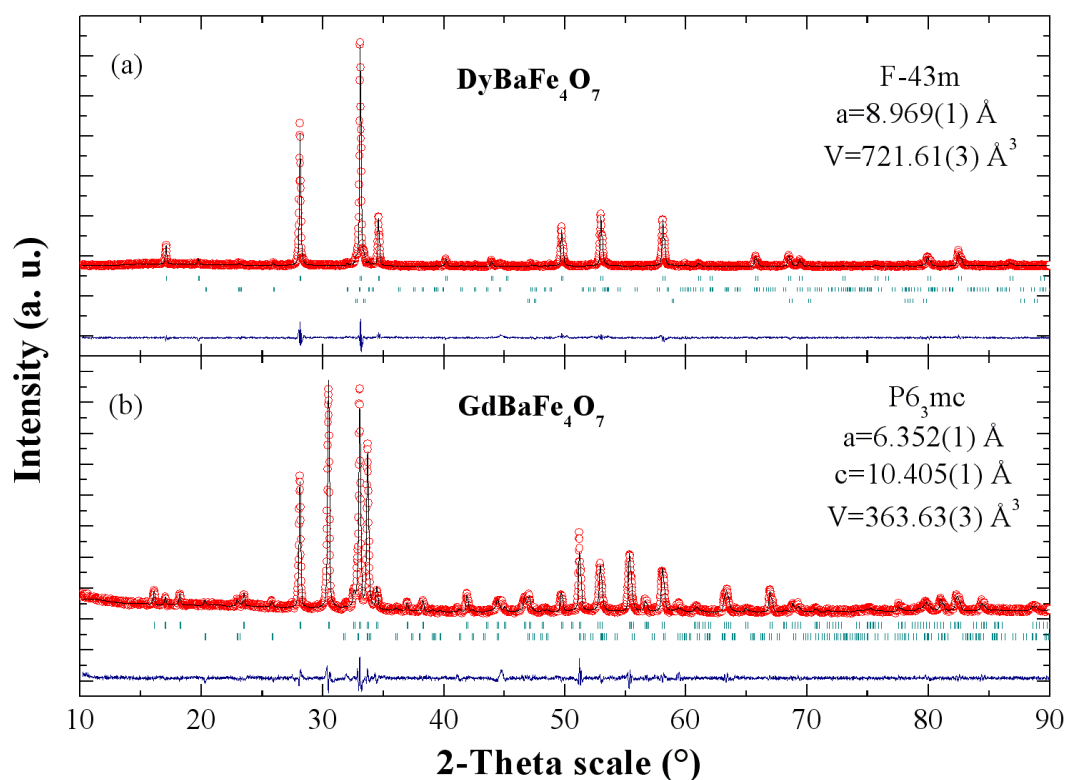

**Figure S1:** X-ray diffraction patterns for (a) DyBaFe<sub>4</sub>O<sub>7</sub>, and (b) GdBaFe<sub>4</sub>O<sub>7</sub>. The bottom curve is the difference of patterns,  $y_{\text{obs}} - y_{\text{cal}}$ , and the small bars indicate the angular positions of the allowed Bragg reflections.

| <i>Atom</i> | <i>x</i>    | <i>y</i>    | <i>z</i>    |     |
|-------------|-------------|-------------|-------------|-----|
| <i>Dy</i>   | 0           | 0           | 0           | 4a  |
| <i>Ba</i>   | 3/4         | 3/4         | 3/4         | 4d  |
| <i>Fe</i>   | 0.38295(16) | 0.38295(16) | 0.38295(16) | 16e |
| <i>O1</i>   | 0.7550(11)  | 0           | 0           | 24f |
| <i>O2</i>   | 1/4         | 1/4         | 1/4         | 4c  |

$$\chi^2 = 3.55, \text{RWP} = 4.65\%, \text{RB} = 5.85\%$$

**Table S1:** Atomic coordinates of DyBaFe<sub>4</sub>O<sub>7</sub>.

| <i>Atom</i>       | <i>x</i>   | <i>y</i>   | <i>z</i>   |    |
|-------------------|------------|------------|------------|----|
| <b><i>Gd</i></b>  | 2/3        | 1/3        | 0.8764(2)  | 2b |
| <b><i>Ba</i></b>  | 2/3        | 1/3        | 1/2        | 2b |
| <b><i>Fe1</i></b> | 0.1779(2)  | 0.8221(2)  | 0.6771(7)  | 6c |
| <b><i>Fe2</i></b> | 0          | 0          | 0.4563(8)  | 2a |
| <b><i>O1</i></b>  | 0.4863(10) | 0.5137(10) | 0.7489(12) | 6c |
| <b><i>O2</i></b>  | 0.1655(8)  | 0.8345(8)  | 0.4895(9)  | 6c |
| <b><i>O3</i></b>  | 0          | 0          | 0.284(8)   | 2a |

$$\chi^2 = 5.63, R_{WP} = 2.29\%, R_B = 2.26\%$$

**Table S2:** Atomic coordinates of GdBaFe<sub>4</sub>O<sub>7</sub>.

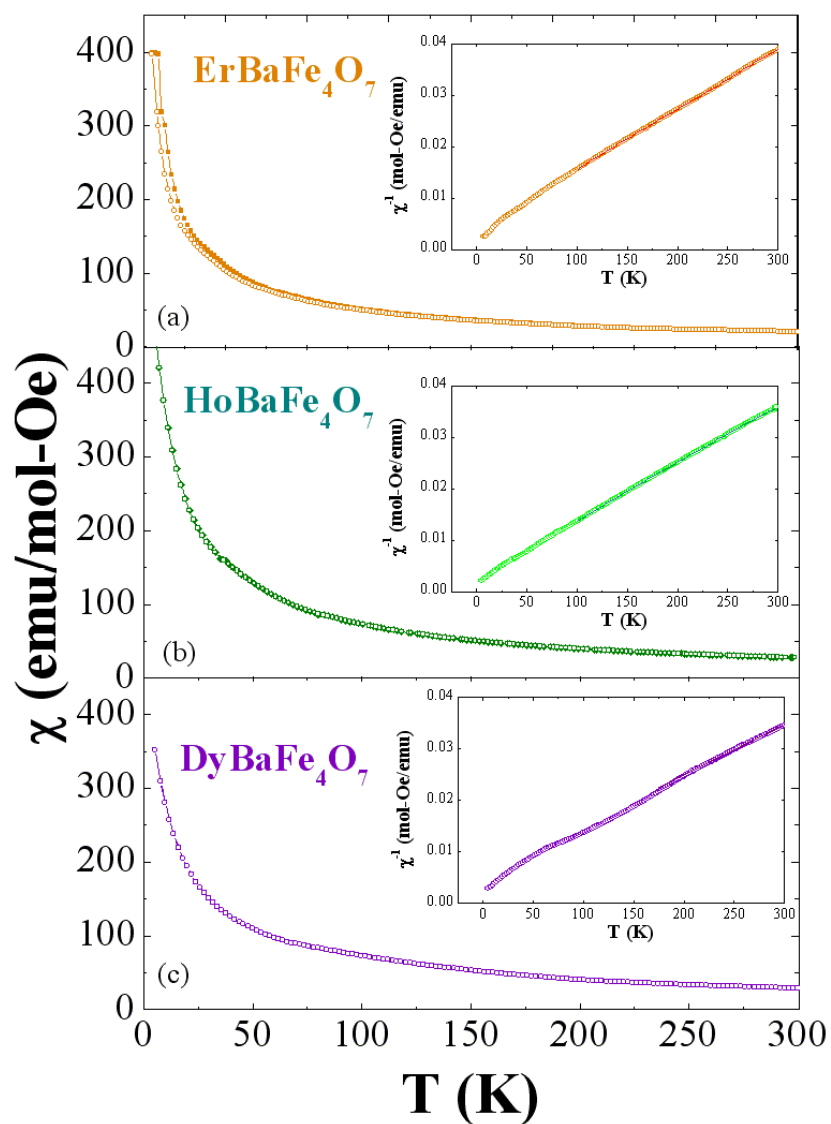

**Figure S2:** DC magnetization versus temperature dependence  $\chi(T)$  of the cubic ferrite  $\text{LnBaFe}_4\text{O}_7$  (a)  $\text{Ln}=\text{Er}$ , (b)  $\text{Ln}=\text{Ho}$ , (c)  $\text{Ln}=\text{Dy}$ , registered under 0.3T. Note that field cooled (FC) and zero field cooled (ZFC) curves cannot be really distinguished.
